# Supplementary material for: Optimized methods for scRNA-seq and snRNA-seq of skeletal muscle stored in nucleic acid stabilizing preservative
Source: PubMed Central journal article supplement (PMC11700216; doi:10.1038/s42003-024-07445-2), 2025-01-04
Supplement: 42003_2024_7445_MOESM3_ESM.pdf [file 42003_2024_7445_MOESM3_ESM.pdf]

## **Description of Additional Supplementary Files**

File name: Supplementary Data 1-4

Description: Source data behind the graphs in the paper
