# Supplementary material for: Optimized methods for scRNA-seq and snRNA-seq of skeletal muscle stored in nucleic acid stabilizing preservative
Source: PubMed Central journal article supplement (PMC11700216; doi:10.1038/s42003-024-07445-2), 2025-01-04
Supplement: 42003_2024_7445_MOESM5_ESM.pdf [file 42003_2024_7445_MOESM5_ESM.pdf]

## Reporting Summary

Nature Portfolio wishes to improve the reproducibility of the work that we publish. This form provides structure for consistency and transparency in reporting. For further information on Nature Portfolio policies, see our [Editorial Policies](#) and the [Editorial Policy Checklist](#).

### Statistics

For all statistical analyses, confirm that the following items are present in the figure legend, table legend, main text, or Methods section.

n/a Confirmed

- The exact sample size ( $n$ ) for each experimental group/condition, given as a discrete number and unit of measurement
- A statement on whether measurements were taken from distinct samples or whether the same sample was measured repeatedly
- The statistical test(s) used AND whether they are one- or two-sided  
*Only common tests should be described solely by name; describe more complex techniques in the Methods section.*
- A description of all covariates tested
- A description of any assumptions or corrections, such as tests of normality and adjustment for multiple comparisons
- A full description of the statistical parameters including central tendency (e.g. means) or other basic estimates (e.g. regression coefficient) AND variation (e.g. standard deviation) or associated estimates of uncertainty (e.g. confidence intervals)
- For null hypothesis testing, the test statistic (e.g.  $F$ ,  $t$ ,  $r$ ) with confidence intervals, effect sizes, degrees of freedom and  $P$  value noted  
*Give  $P$  values as exact values whenever suitable.*
- For Bayesian analysis, information on the choice of priors and Markov chain Monte Carlo settings
- For hierarchical and complex designs, identification of the appropriate level for tests and full reporting of outcomes
- Estimates of effect sizes (e.g. Cohen's  $d$ , Pearson's  $r$ ), indicating how they were calculated

*Our web collection on [statistics for biologists](#) contains articles on many of the points above.*

### Software and code

Policy information about [availability of computer code](#)

Data collection

No software was used to collect data

Data analysis

FASTQ files were demultiplexed in Cell Ranger\_7.2.0 (10x Genomics) and mapped to the GRCh38-2020-A transcriptome. Ambient RNA excluded with CellBender\_0.3.0 22. Quality control and clustering was performed with Seurat\_5.0.1 23, SeuratObject\_5.0.0, and DoubletFinder\_2.0.3 24. Filtering was performed as follows:  $nFeature\_RNA \geq 200$ ,  $nFeature\_RNA \leq 2500$ , percentage reads mapped mitochondrial RNAs (PMMR)  $\leq 10$ . Predicted doublet rate was set at 0.05. Because all specimens were derived from the same starting material and sequenced in a single batch, data were log normalized with a scale factor of 10000. Differential abundance testing was performed with MiloR\_1.8.1 18. Over representation analyses (ORA) and gene set enrichment analyses (GSEA) were performed in WebGestalt\_0.4.6 25. Additional R software packages are listed below:

R version 4.3.2 (2023-10-31)  
Platform: aarch64-apple-darwin20 (64-bit)  
Running under: macOS Ventura 13.6.4

attached base packages:  
[1] stats graphics grDevices utils datasets methods base

other attached packages:  
[1] DoubletFinder\_2.0.4 ggplot2\_3.4.4 cowplot\_1.1.3 patchwork\_1.2.0 dplyr\_1.1.4 Seurat\_5.0.1 SeuratObject\_5.0.1  
[8] sp\_2.1-3

loaded via a namespace (and not attached):

```
[1] deldir_2.0-2 pbapply_1.7-2 gridExtra_2.3 rlang_1.1.3 magrittr_2.0.3 RcppAnnoy_0.0.22
[7] spatstat.geom_3.2-8 matrixStats_1.2.0 ggridges_0.5.6 compiler_4.3.2 png_0.1-8 vctrs_0.6.5
[13] reshape2_1.4.4 stringr_1.5.1 pkgconfig_2.0.3 shape_1.4.6 fastmap_1.1.1 ellipsis_0.3.2
[19] utf8_1.2.4 promises_1.2.1 purrr_1.0.2 jsonlite_1.8.8 goftest_1.2-3 later_1.3.2
[25] spatstat.utils_3.0-4 irlba_2.3.5.1 parallel_4.3.2 cluster_2.1.6 R6_2.5.1 ica_1.0-3
[31] stringi_1.8.3 RColorBrewer_1.1-3 spatstat.data_3.0-4 reticulate_1.35.0 parallelly_1.36.0 lmtest_0.9-40
[37] scattermore_1.2 Rcpp_1.0.12 tensor_1.5 future.apply_1.11.1 zoo_1.8-12 sctransform_0.4.1
[43] httpuv_1.6.14 Matrix_1.6-5 splines_4.3.2 igraph_2.0.1.1 tidyselect_1.2.0 abind_1.4-5
[49] rstudioapi_0.15.0 spatstat.random_3.2-2 codetools_0.2-19 miniUI_0.1.1.1 spatstat.explore_3.2-6 listenv_0.9.1
[55] lattice_0.22-5 tibble_3.2.1 plyr_1.8.9 withr_3.0.0 shiny_1.8.0 ROCR_1.0-11
[61] Rtsne_0.17 future_1.33.1 fastDummies_1.7.3 survival_3.5-7 polyclip_1.10-6 zip_2.3.1
[67] fitdistrplus_1.1-11 circlize_0.4.15 pillar_1.9.0 KernSmooth_2.23-22 plotly_4.10.4 generics_0.1.3
[73] RcppHNSW_0.6.0 munsell_0.5.0 scales_1.3.0 globals_0.16.2 xtable_1.8-4 glue_1.7.0
[79] lazyeval_0.2.2 tools_4.3.2 data.table_1.15.0 RSpectra_0.16-1 openxlsx_4.2.5.2 RANN_2.6.1
[85] leiden_0.4.3.1 dotCall64_1.1-1 grid_4.3.2 tidyr_1.3.1 colorspace_2.1-0 nlme_3.1-164
[91] cli_3.6.2 spatstat.sparse_3.0-3 spam_2.10-0 fansi_1.0.6 viridisLite_0.4.2 uwot_0.1.16
[97] gtable_0.3.4 digest_0.6.34 progressr_0.14.0 ggrepel_0.9.5 htmlwidgets_1.6.4 htmltools_0.5.7
[103] lifecycle_1.0.4 httr_1.4.7 GlobalOptions_0.1.2 mime_0.12 MASS_7.3-60.0.1
```

For manuscripts utilizing custom algorithms or software that are central to the research but not yet described in published literature, software must be made available to editors and reviewers. We strongly encourage code deposition in a community repository (e.g. GitHub). See the Nature Portfolio [guidelines for submitting code & software](#) for further information.

## Data

Policy information about [availability of data](#)

All manuscripts must include a [data availability statement](#). This statement should provide the following information, where applicable:

- Accession codes, unique identifiers, or web links for publicly available datasets
- A description of any restrictions on data availability
- For clinical datasets or third party data, please ensure that the statement adheres to our [policy](#)

Accession codes will be made available before publication

## Human research participants

Policy information about [studies involving human research participants and Sex and Gender in Research](#).

Reporting on sex and gender

Sex and gender were not reported in this study

Population characteristics

De-identified biopsied skeletal muscle tissue from patients without type 2 diabetes were used.

Recruitment

Ethical approval for the AADM study under which the samples were collected was obtained from the National Institutes of Health (09-HG-N070) and the National Health Research Ethics Committee of Nigeria (NHREC). Informed consent was obtained from all participants prior to enrollment. The research adhered to the Declaration of Helsinki

Ethics oversight

National Institutes of Health (09-HG-N070); National Health Research Ethics Committee of Nigeria (NHREC)

Note that full information on the approval of the study protocol must also be provided in the manuscript.

## Field-specific reporting

Please select the one below that is the best fit for your research. If you are not sure, read the appropriate sections before making your selection.

Life sciences  Behavioural & social sciences  Ecological, evolutionary & environmental sciences

For a reference copy of the document with all sections, see [nature.com/documents/nr-reporting-summary-flat.pdf](https://www.nature.com/documents/nr-reporting-summary-flat.pdf)

## Life sciences study design

All studies must disclose on these points even when the disclosure is negative.

Sample size

No sample-size calculations were performed. Three samples were chosen at random from a de-identified list, tissue was pooled, and a subset of the pool equalling approximately 100mg was extracted for further experimentation.

Data exclusions

No data were excluded from the analysis.

|               |                                                                                         |
|---------------|-----------------------------------------------------------------------------------------|
| Replication   | Experimental findings were confirmed via four data processing pipelines.                |
| Randomization | No randomized studies were performed.                                                   |
| Blinding      | No blinding was used since experiments were performed on de-identified biopsied tissue. |

## Reporting for specific materials, systems and methods

We require information from authors about some types of materials, experimental systems and methods used in many studies. Here, indicate whether each material, system or method listed is relevant to your study. If you are not sure if a list item applies to your research, read the appropriate section before selecting a response.

### Materials & experimental systems

|                                     |                                                        |
|-------------------------------------|--------------------------------------------------------|
| n/a                                 | Involved in the study                                  |
| <input type="checkbox"/>            | <input checked="" type="checkbox"/> Antibodies         |
| <input checked="" type="checkbox"/> | <input type="checkbox"/> Eukaryotic cell lines         |
| <input checked="" type="checkbox"/> | <input type="checkbox"/> Palaeontology and archaeology |
| <input checked="" type="checkbox"/> | <input type="checkbox"/> Animals and other organisms   |
| <input checked="" type="checkbox"/> | <input type="checkbox"/> Clinical data                 |
| <input checked="" type="checkbox"/> | <input type="checkbox"/> Dual use research of concern  |

### Methods

|                                     |                                                    |
|-------------------------------------|----------------------------------------------------|
| n/a                                 | Involved in the study                              |
| <input checked="" type="checkbox"/> | <input type="checkbox"/> ChIP-seq                  |
| <input type="checkbox"/>            | <input checked="" type="checkbox"/> Flow cytometry |
| <input checked="" type="checkbox"/> | <input type="checkbox"/> MRI-based neuroimaging    |

### Antibodies

|                 |                                                                                                                                                  |
|-----------------|--------------------------------------------------------------------------------------------------------------------------------------------------|
| Antibodies used | Alexa Fluor® 594 (NPC-AF594) antibody (BioLegend, San Diego, CA, catalogue no. 682202)                                                           |
| Validation      | All primary conjugated antibodies were validated for specificity by the suppliers. Validation methods are supplied on the manufacturer websites. |

### Flow Cytometry

#### Plots

Confirm that:

- The axis labels state the marker and fluorochrome used (e.g. CD4-FITC).
- The axis scales are clearly visible. Include numbers along axes only for bottom left plot of group (a 'group' is an analysis of identical markers).
- All plots are contour plots with outliers or pseudocolor plots.
- A numerical value for number of cells or percentage (with statistics) is provided.

#### Methodology

Sample preparation

Tissue was obtained from a single percutaneous needle biopsy of the vastus lateralis muscle. Tissue was immediately dissected into skeletal muscle and adipose tissue parts and placed separately in Allprotect® Tissue Reagent (ATR) (Qiagen, Germantown, MD, catalogue no. 76405) to stabilize tissue RNA, DNA and proteins. Tissues were transitioned to -80°C until shipped on dry ice from the study site (Ibadan, Nigeria) to the Center for Research on Genomics and Global Health at the National Institutes of Health (Bethesda, MD, USA). Skeletal muscle specimens stored in Allprotect® Tissue Reagent (ATR) were thawed on ice. Ice cold PBS was added and pipette-mixed with ATR to dilute and remove supernatant. This process was repeated until all ATR was removed. Tissue was subsequently rinsed twice in ice cold PBS to remove any remaining ATR, weighed, and resuspended in pBSA (PBS + 0.04% BSA) + 1U/mL RNaseOut (RNaseOUT™ Recombinant RNase Inhibitor, Thermo Fisher Scientific, Waltham, MA, catalogue no. 10777019). Manual tissue dissociation was performed with a disposable micro-tissue homogenizer. Cell concentrations were estimated with a hemocytometer. Single cell suspensions were strained sequentially through 70 µm and 40 µm filters, with washes between each step ("filtration alone" samples). For sorted samples, cells were stained with a final concentration of 25 µg/mL anti-Nuclear Pore Complex conjugated to Alexa Fluor® 594 (NPC-AF594) antibody (BioLegend, San Diego, CA, catalogue no. 682202) at 4°C, 30 minutes. Excess antibody was removed and NPC+ cells isolated on a Becton Dickinson FACS ARIA Fusion using a 70 µm nozzle. For nuclei isolation, cells were incubated with Nuclear Extraction Buffer (Miltenyi Biotec, Gaithersburg, MD, catalogue no. 130-128-024) containing 1 U/mL RNaseOut at 4°C for 5 minutes. Following the incubation, suspensions were centrifuged at 300 x g, 4°C, 5 minutes, supernatant removed, and nuclei resuspended in pBSA. Samples were sorted on ice into pBSA before downstream processing. Note that "sorted nuclei" refers to cells that were sorted prior to nuclei extraction.

Instrument

Becton Dickinson FACS ARIA Fusion using a 70 µm nozzle

Software

BD FACS DIVA software

Cell population abundance

Post-sort purity was determined by re-analyzing sorted cells and visually by confocal microscopy. Post-sort analysis demonstrated 85% - 90% purity.

Gating strategy

Cells were gated on FSC/SSC, followed by FSC-A/FSC-W to SSC-A/SSC-W. Sorted cells were collected by NPC-AF594/FSC-A positivity, where positivity was determined against unstained sample processed in parallel.

Tick this box to confirm that a figure exemplifying the gating strategy is provided in the Supplementary Information.
